# Supplementary material for: Interaction in Li@Fullerenes and Li+@Fullerenes: First Principle Insights to Li-Based Endohedral Fullerenes
Source: MDPI journal article supplement (doi:10.3390/nano9040630), 2019-04-18
Supplement: s1 [file s1]

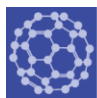

## Supplementary Material

### Interaction in Li@Fullerenes and Li<sup>+</sup>@fullerenes: First Principle Insights to Li-based Endohedral Fullerenes

Hongcun Bai <sup>1,\*</sup>, Hongfeng Gao <sup>1</sup>, Wei Feng <sup>1</sup>, Yaping Zhao <sup>1</sup> and Yuhua Wu <sup>1</sup>

<sup>1</sup> State Key Laboratory of High-efficiency Utilization of Coal and Green Chemical Engineering, College of Chemistry and Chemical Engineering, Ningxia University, Yinchuan 750021, Ningxia, China

\* Correspondence: hongcunbai@gmail.com, hongcunbai@nxu.edu.cn; Tel.: +86-951-206-2328

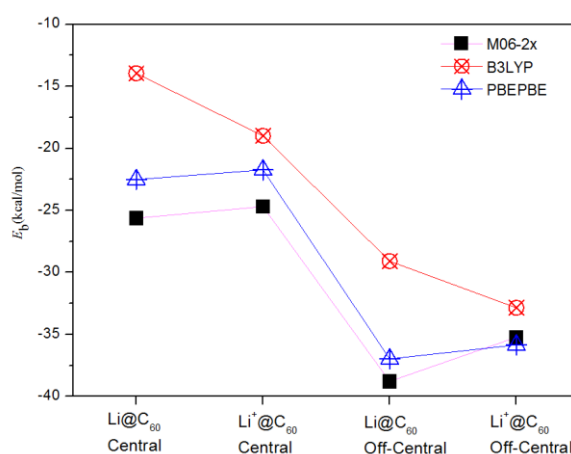

**Figure S1.** The binding energy of Li@C<sub>60</sub> and Li<sup>+</sup>@C<sub>60</sub> obtained by PBEPBE, B3LYP and M06-2X methods

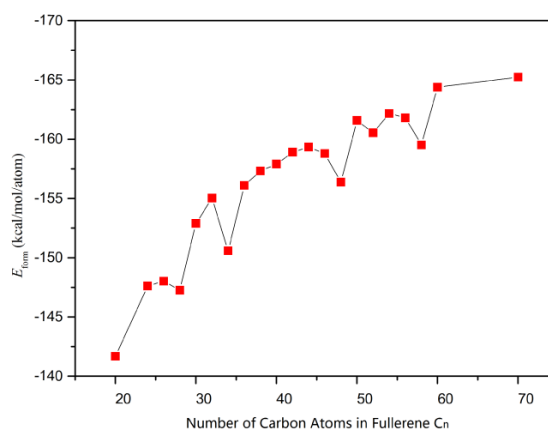

**Figure S2.** The formation energy of the empty cages (in kcal/mol/atom)
